# REFERENCES

1. Seagard JL, Elegbe EO, Hopp FA, Bosnjak ZJ, von Colditz JH, Kalbfleisch JH, Kampine JP: Effects of isoflurane on the baroreceptor reflex. *ANESTHESIOLOGY* 59:511-520, 1983

2. Seagard JL, Hopp FA, Kalbfleisch JH, Kampine JP: Halothane and the carotid sinus reflex: Evidence for multiple sites of action. *ANESTHESIOLOGY* 57:191-201, 1982

(Accepted for publication May 7, 1984.)

Anesthesiology  
61:481-482, 1984

## A Simple Device for Oxygen Insufflation with Continuous Positive Airway Pressure during One-lung Ventilation

*To the Editor:*—Hypoxemia is a significant clinical problem in approximately 20% of patients for whom a one-lung ventilation (OLV) anesthetic technique is utilized. Oxygen insufflation to the upper, nonventilated lung with continuous positive airway pressure (CPAP) is reported to increase  $\text{PaO}_2$  during OLV.<sup>1,2</sup> We have constructed an inexpensive, reusable, and readily available device that provides  $\text{O}_2$  insufflation with variable CPAP to the upper, nonventilated lung during OLV (fig. 1).

A modified Ayre's T-piece (essentially a Mapleson E system) is connected to the lumen of a double-lumen endotracheal tube that supplies the nonventilated lung. The fresh gas port of the T-piece is connected to an

oxygen source, either a tank or a wall outlet, via an appropriate flowmeter. A reusable valve designed to produce positive end-expiratory pressure (Boehringer Laboratories, Wynewood, Pennsylvania) is connected to the corrugated tubing at the end of the T-piece assembly.<sup>3</sup> Using this system clinically, we have observed

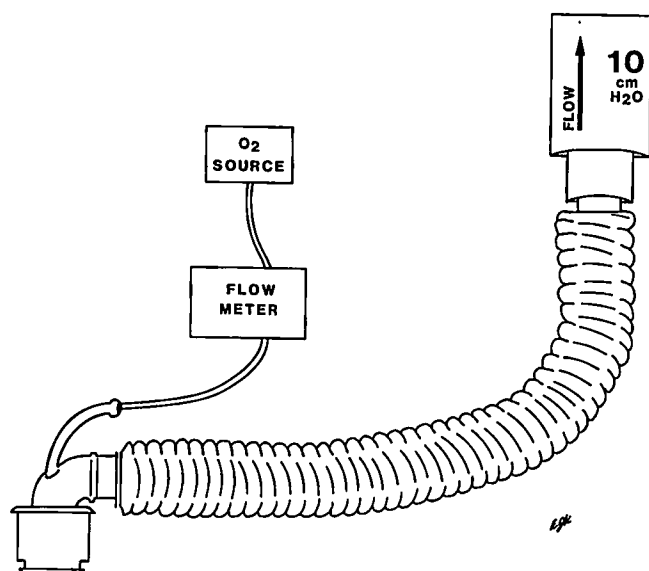

FIG. 1. A modified Mapleson "E" open-ended anesthesia circuit is connected to an oxygen source via a flow meter, and to a Boehringer "PEEP" valve at the distal end. When the system is connected to the nonventilated lung with an oxygen flow rate of  $8 \text{ l} \cdot \text{min}^{-1}$ , this circuit will provide oxygen insufflation; the level of CPAP is indicated on the valve, provided the valve is fixed in the vertical position.

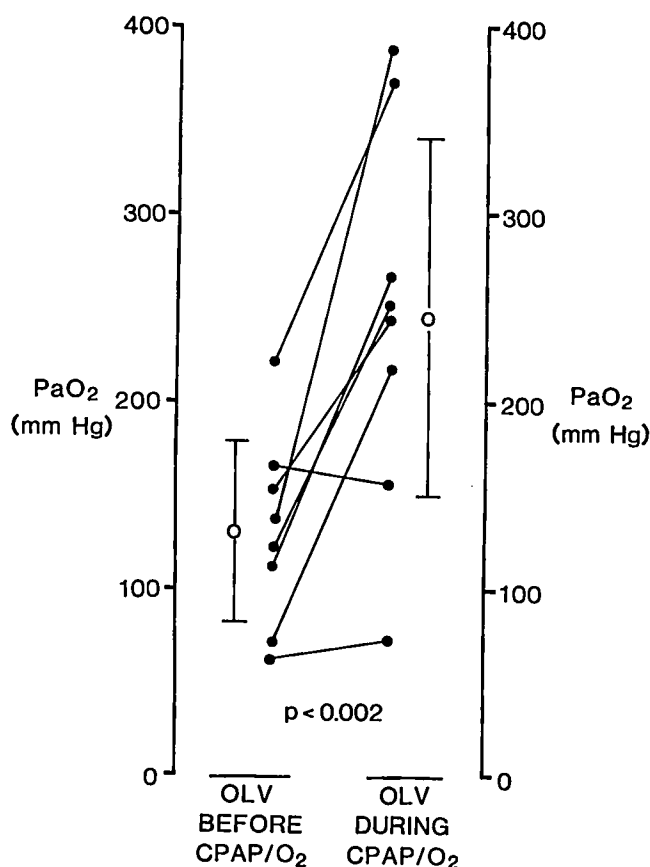

FIG. 2. Arterial oxygen tension ( $\text{PaO}_2$ ) measured after 20 min of (OLV) without CPAP/ $\text{O}_2$  is shown compared with similar data obtained 20 min after starting CPAP/ $\text{O}_2$  to the nonventilated lung. Open symbols show mean values for each group with brackets to indicate one standard deviation.

airway pressure in the nonventilated lung to vary less than 1 cmH<sub>2</sub>O from the 10 cmH<sub>2</sub>O indicated on the valve (with an 8 l·min<sup>-1</sup> oxygen flow rate). Other O<sub>2</sub> flow rates were not tested clinically; however, bench testing of the circuit with O<sub>2</sub> flow rates varying from 1 to 10 l·min<sup>-1</sup> produced less than 10% (1 cmH<sub>2</sub>O) variation from the indicated pressure at all O<sub>2</sub> flow rates tested. Clinically, use of this circuit to provide CPAP and O<sub>2</sub> insufflation to the nonventilated lung during continuous OLV significantly improved PaO<sub>2</sub> in patients undergoing thoracotomy, as shown in figure 2.

Capan *et al.*<sup>1</sup> have described a similar system to provide CPAP and O<sub>2</sub> insufflation to the nonventilated lung during which they used an adjustable pressure relief valve to limit the escape of oxygen from the insufflation circuit. This system has the disadvantage that an inadvertent occlusion of the valve or an increase in flow rate could create high airway pressures. The system we describe utilizes reusable materials that are readily available within most anesthesiology departments, which gives it the combined advantages of availability and simplicity. Over-pressure is highly unlikely, since 10 cmH<sub>2</sub>O pressure relief (independent of O<sub>2</sub> flow rate from 1 to 10 l·min<sup>-1</sup>) is designed into the system. We

observed no difficulty with the circuit; furthermore, 10 cmH<sub>2</sub>O CPAP does not appear to interfere with surgical exposure and may even facilitate intralobar dissection.

DAVID L. BROWN, M.D.  
Staff Anesthesiologist  
Lackland Air Force Base  
Texas

RICHARD F. DAVIS, M.D.  
Assistant Professor  
Department of Anesthesiology  
University of Florida College of Medicine  
Gainesville, Florida 32610

#### REFERENCES

1. Capan LM, Turndorf H, Patel C, Ramanathan S, Acinapura A, Chalon J: Optimization of arterial oxygenation during one-lung anesthesia. *Anesth Analg* 59:847-851, 1980
2. Alfrey DD, Benumof JL, Trousdale FR: Improving oxygenation during one-lung ventilation in dogs: The effects of positive end-expiratory pressure and blood flow restriction to the nonventilated lung. *ANESTHESIOLOGY* 55:381-385, 1981
3. Weeks DB, Comer PB: A PEEP device for anesthesia circuits. *Anesth Analg* 56:578-580, 1977

(Accepted for publication May 9, 1984.)

Anesthesiology  
61:482-483, 1984

### Does Isoflurane Really Preserve Baroreflex Responsiveness Better than Halothane or Enflurane?

*To the Editor:*—Kotrly *et al.* assert that "the data indicate isoflurane preserves baroreflex regulation of heart rate better than either halothane or enflurane" and suggest that isoflurane may be the preferred inhalational anesthetic in clinical situations where baroreflex responsiveness would be important, *e.g.*, acute hypovolemia or position changes under anesthesia.<sup>1</sup> There are four reasons why I believe these conclusions to be premature.

First, if the pressor slopes (R-R interval *vs.* blood pressure) for isoflurane from Duke *et al.*<sup>2</sup> are plotted *versus* MAC multiples as in figure 6 of reference 1, the line for isoflurane can be superimposed on the halothane-N<sub>2</sub>O one and is parallel to those for halothane, enflurane, and enflurane-N<sub>2</sub>O. Even if the concentration of isoflurane is reduced but the level of anesthesia maintained with N<sub>2</sub>O, the isoflurane-N<sub>2</sub>O line can be superimposed on the isoflurane one. Thus, the data of Duke *et al.* do not show the degree of sparing of baroreflex responsiveness that Kotrly observed.

Given the above, the question is raised as to how comparable are the experimental methods from the two

different laboratories. Duke controlled ventilation to keep the arterial P<sub>CO<sub>2</sub></sub> about 35 mmHg.<sup>3</sup> It is not clear from Kotrly's article whether ventilation was controlled and what the actual arterial P<sub>CO<sub>2</sub></sub>s were. A statement is made that "all subjects resumed spontaneous ventilation prior to the tests carried out during anesthesia."<sup>1</sup> Thus, the arterial P<sub>CO<sub>2</sub></sub> may have been 50 mmHg.<sup>4</sup> An elevated CO<sub>2</sub> tension could increase sympathetic outflow from the vasomotor center, one component of the baroreflex arc.

Thirdly, in two elegant studies in dogs, Kampine's group determined that both halothane and isoflurane, with a thiopental background, attenuated in a dose-related manner all the individual components of the baroreceptor reflex arc except the baroreceptor itself, which was sensitized.<sup>5,6</sup> When the intact reflex arc was studied, isoflurane at 1 MAC appeared to be less depressant than halothane at 1 MAC. However, the control slopes (R-R interval in ms *vs.* mean BP in mmHg) in the conscious dogs are so different (12.38 ± 3.6 ms/mmHg for halothane and 59.4 ± 16.5 ms/mmHg for isoflurane). If the halothane data were normalized to the same
